# Supplementary material for: Racial and ethnic variation in emergent surgical care and outcomes during the COVID-19 pandemic: post hoc analysis of an EAST MCT
Source: HighWire-hosted journal article supplement (doi:10.1136/tsaco-2022-001023), 2022-12-01

**A** Time from Triage to Initial Intervention - Appendicitis

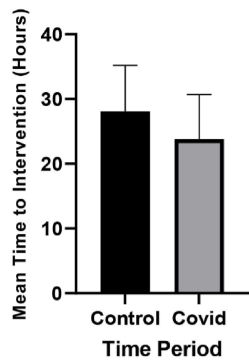

**B** Time from Triage to Initial Intervention - Appendicitis

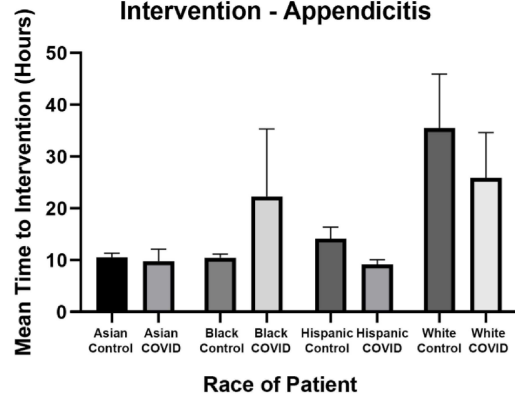

**C** Time from Triage to Initial Intervention - Cholecystitis

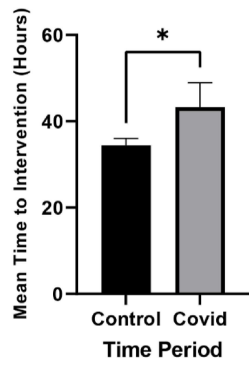

**D** Time from Triage to Initial Intervention - Cholecystitis

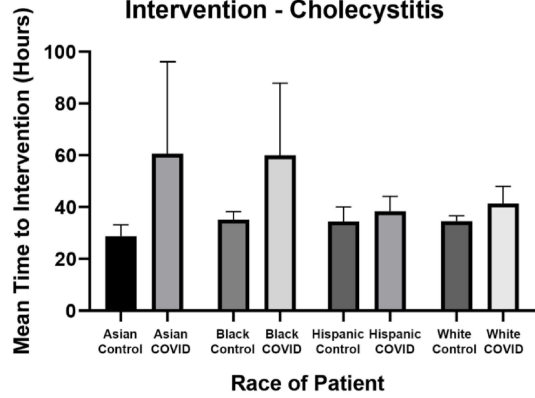

Supplement: tsaco-2022-001023supp001_data_supplement.pdf [file tsaco-2022-001023supp001_data_supplement.pdf]
