# Supplementary figures and images for: Racial and ethnic variation in emergent surgical care and outcomes during the COVID-19 pandemic: post hoc analysis of an EAST MCT
Source: HighWire-hosted journal article supplement (doi:10.1136/tsaco-2022-001023), 2022-12-01

A

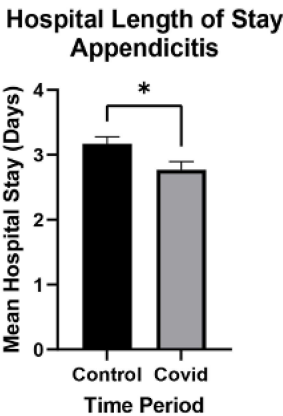

B

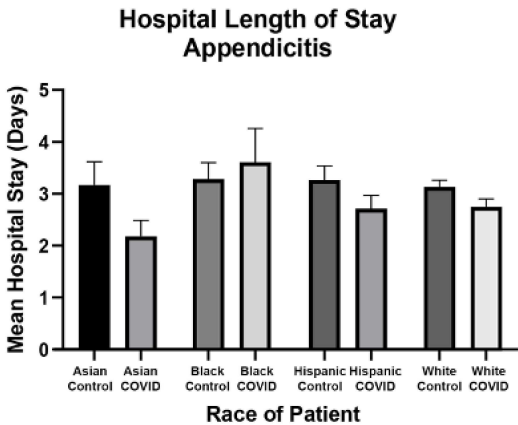

C

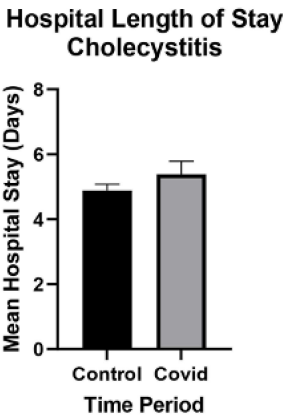

D

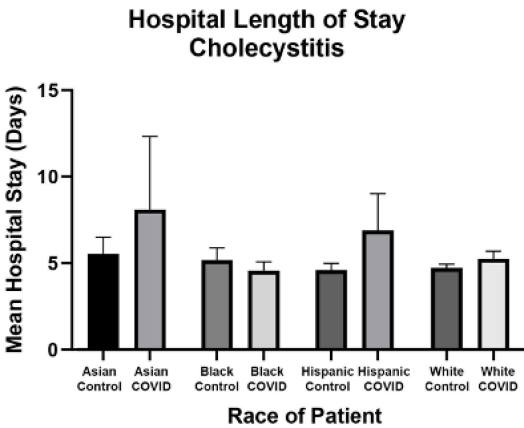

Supplement: tsaco-2022-001023supp002_data_supplement.pdf [file tsaco-2022-001023supp002_data_supplement.pdf]
